# Supplementary material
Source: ML conference proceedings conference paper supplement (https://proceedings.mlr.press/v108/kim20a.html)
Supplement: Supplementary file [file kim20a-supp.pdf]

## A Technical Assumptions

Before stating the assumptions, we first define the  $\psi_2$ -norm.

**Definition A.1** ( $\psi_2$ -norm). *For a real valued random variable  $A$ , its  $\psi_2$  norm is defined by*

$$\|A\|_{\psi_2} = \inf\{u > 0 : \mathbb{E} \exp(A^2/u^2) \leq 2\}.$$

**Definition A.2** (sub-Gaussian). *We say that a real random variable  $A$  is 1-sub-Gaussian if  $\|A\|_{\psi_2} < 1$ . We say that a random variable  $B$  with values in  $\mathbb{R}^N$  is 1-sub-Gaussian if  $\langle B, v \rangle$  is 1-sub-Gaussian for all  $v \in \mathbb{R}^N$  with  $\|v\| = 1$ .*

As mentioned previously, we need to have assumptions that control the growth of  $W_t$  to be not too large and not too small. Because we have two phases the algorithm, initialization and iteration, we require two forms of these bounds. For initialization, our assumption is essentially the same as Assumption 1 of Lounici et al. (2014).

**Assumption A.3** (sub-Gaussian  $W_t$ ). *For each  $m \leq t$ , each column  $w_m \in \mathbb{R}^r$  of  $W_t$  satisfies:*

1.  $w_m$  is drawn independently (for each  $m$ ) from a 1-sub-Gaussian distribution;

2. there exists a numerical constant  $c_1$  with  $0 < c_1 \leq 1$  such that

$$\mathbb{E}(\langle w_m, u \rangle) \geq c_1 \|\langle w_m, u \rangle\|_{\psi_2} \quad \forall u \in \mathbb{R}^r.$$

For iteration, we also need non-asymptotic bounds on the singular values, which would hold if  $W_t$  were i.i.d. Gaussian from results from random matrix theory (see Corollary 5.35 of Vershynin (2010)).

**Assumption A.4** (Growth of Singular Values). *We assume that  $\sigma_r(\dot{X}) > 0$ , and that there exists a  $C_{sv}$  large enough that for every  $t \geq C_{sv}$ ,  $\dot{X}W_t$  satisfies*

$$\sigma_r(\dot{X}W_t^T) \geq \frac{3}{4} \sigma_r(\dot{X}) \sqrt{t}, \quad \|\dot{X}W_t^T\| \leq \frac{3}{2} \sigma_1(\dot{X}) \sqrt{t} \quad (8)$$

with probability at least  $1 - t^{-2}$  for  $t \geq C_{sv}$ .

For matrix completion, we need an incoherence assumption as in Candès and Tao (2009), Candès and Recht (2009), and Recht (2011). There are many ways of interpreting this parameter, but intuitively, it says that observing an entry actually gives information about other entries. It turns out that generating i.i.d. Gaussians for each entry of  $W_M$  will produce right singular vectors that are incoherent: with  $W_M = U_{W_M} \Sigma_{W_M} V_{W_M}^T$  the SVD, for some constants  $C, c$ , with probability at least  $1 - cM^{-3} \log M$ ,  $\max_i \|P_{V_{W_M}} e_i\| \leq \sqrt{C \max\{r, \log M\}/M}$  (See Lemma 2.2 of (Candès and Recht, 2009)). Here  $P_V$  denotes projection to the column space of  $V$ . This metric is equivalent to the coherence definition given below, which leads to Assumption A.6.

**Definition A.5.** *The coherence of an  $M \times r$  matrix  $V$  is  $\mu(V) := \max_{m \in [M]} (M/r) \|e_m^T V\|_2^2$ .*

**Assumption A.6** (Incoherence). *There exists some  $C_{inc}$  such that for large enough  $M$ , for any subset of  $[t]$  of size  $M$ , with probability at least  $1 - M^{-3} \log M$ ,  $\mu(V_{W_M}) \leq C_{inc} \log M$ .*

Note we do not assume incoherence of the column space of  $\dot{X}$ . In practice, having incoherent column space is probably helpful. But for our theoretical results, because  $N$  is fixed as the number of columns  $t$  is growing, incoherence of  $\dot{X}$ , which provides high probability bounds with respect to  $N$  (not  $t$ ), are not as useful.

## B Algorithm for Two Block Sizes and Uniformly Random Sampling Theorems

---

**Algorithm 2** DOUBLECOLUMNSPACEESTIMATE: column space estimation with two block sizes

---

**Input:** Partially observable  $Y_t \in \mathbb{R}^{N \times t}$ ;  $k^{(1)}, k^{(2)} \in \mathbb{N}$ , such that the total number of samples per column is  $k^{(1)} + k^{(2)}$ ;  $M_{\text{init}} \in \mathbb{N}$  the number of columns for initialization;  $M_1, M_2 \in \mathbb{N}$ , the sizes of blocks of columns for least squares;  $s_1, s_2 \in \mathbb{N}$  the numbers of blocks;  $\epsilon$ , the desired accuracy;  $a$ , a boolean indicator of active sampling

```

1: function DOUBLECOLUMNSPACEESTIMATE( $Y_t, k^{(1)}, k^{(2)}, M_{\text{init}}, M_1, M_2, s_1, s_2, \epsilon, a$ )
2:   ▷ Spectral initialization with uniformly random sampling
3:    $\Omega_{M_{\text{init}}} \leftarrow \emptyset$ 
4:   for  $m = 1, \dots, M_{\text{init}}$  do
5:      $S \sim \text{Unif}(\mathcal{C}(N, k^{(1)} + k^{(2)}))$ 
6:      $\Omega \leftarrow \Omega \cup (S \times \{m\})$ 
7:   end for
8:    $\hat{X} \leftarrow \text{SCALEDPCA}(\mathcal{P}_\Omega(Y_t), k^{(1)} + k^{(2)}, N)$ 
9:   ▷ Least squares iteration
10:   $L_1 \leftarrow C^{\text{med}}[\log M_1]$ 
11:  for  $i = 1, \dots, s_1$  do
12:     $m \leftarrow M^{\text{init}} + (i - 1)L_1M_1 + 1$ 
13:     $I \leftarrow [m : (m + L_1M_1 - 1)]$ 
14:     $\Omega^{(1)}, \Omega^{(2)} \leftarrow \text{SAMPLE}(\hat{X}, k^{(1)}, k^{(2)}, I, a)$ 
15:     $\hat{X} \leftarrow \text{MEDIANLS}(\hat{X}, Y_t, \Omega^{(1)}, \Omega^{(2)}, M_1, m, \epsilon)$ 
16:     $\Omega \leftarrow \Omega \cup \Omega^{(1)} \cup \Omega^{(2)}$ 
17:  end for
18:   $L_2 \leftarrow C^{\text{med}}[\log M_2]$ 
19:  for  $i = 1, \dots, s_2$  do
20:     $m \leftarrow M^{\text{init}} + s_1L_1M_1 + (i - 1)L_2M_2 + 1$ 
21:     $I \leftarrow [m : (m + L_2M_2 - 1)]$ 
22:     $\Omega^{(1)}, \Omega^{(2)} \leftarrow \text{SAMPLE}(\hat{X}, k^{(1)}, k^{(2)}, I, a)$ 
23:     $\hat{X} \leftarrow \text{MEDIANLS}(\hat{X}, Y_t, \Omega^{(1)}, \Omega^{(2)}, M_2, m, \epsilon)$ 
24:     $\Omega \leftarrow \Omega \cup \Omega^{(1)} \cup \Omega^{(2)}$ 
25:  end for
26:  return  $\hat{X}, \Omega$ 
27: end function

```

---

**Theorem B.1** (Noisy observations, random sampling, for small  $\sigma_Z/\epsilon$ ). *Suppose that  $U$ , the orthonormal part of  $\text{QR}(\hat{X})$ , is  $k^{(1)}$ -isomeric. Suppose further that Assumptions 2.1, 4.5, A.3, A.4, A.6 hold, and  $N/2 \geq k^{(1)} \geq r, k^{(2)} \geq 1, 1 \geq \epsilon \geq e^{-M}M$ , and Equation (2) hold. Then there exists constants  $C_{B.1}^{\text{init}}, C_{B.1}^{\text{iter}}, C_{B.1}^{\text{prob}}$  such that for all  $\epsilon > 0$ , if we initialize with  $M_{\text{init}}$  columns, where*

$$M_{\text{init}} \geq C_{B.1}^{\text{init}} \frac{\sigma_1(\hat{X})^6 N^2 (\log M_{\text{init}})^3 r^2}{\sigma_r(\hat{X})^6 (k^{(1)} + k^{(2)})^2 \sigma_*(U; k^{(1)})^2},$$

and we use  $s$  blocks, where  $s \geq \log\left(\frac{\sigma_r \sigma_*(U; k^{(1)})}{48\sqrt{r}\epsilon}\right)$ , and each block has size  $M$ , with

$$M \geq C_{B.1}^{\text{iter}} \frac{\sigma_1(\hat{X})^6 r^3 N (\log M)^2}{\sigma_r(\hat{X})^6 k^{(2)} \sigma_*(U; k^{(1)})^2} + \log\left(\frac{1}{\epsilon}\right),$$

then  $\text{COLUMNSPACEESTIMATE}(Y_t, k^{(1)}, k^{(2)}, M_{\text{init}}, M, s, \epsilon, \text{True})$  returns an  $\hat{X}$  such that  $\sin \theta(U, \hat{X}) \leq \epsilon$  with probability at least  $1 - 2M_{\text{init}}^{-2} - C_{B.1}^{\text{prob}} s M^{-2}$ .

**Theorem B.2** (Noisy observations, random sampling, for large  $\frac{\sigma_Z}{\epsilon}$ ). *Suppose Assumptions 2.1, 4.1, A.3, A.4, A.6 hold, and  $N/2 \geq k^{(1)} \geq r, k^{(2)} \geq 1, 1 \geq \epsilon \geq e^{-M}M$ . Let  $\epsilon$  satisfy equation (3). Then there exist constants  $C_{B.2}^{\text{init}}, C_{B.2}^{\text{iter}}, C_{B.2}^{\text{prob}}$  such that for every  $\epsilon > 0$ , if we initialize with  $M_{\text{init}}$  columns, where*

$$M_{\text{init}} \geq C_{B.2}^{\text{init}} \frac{\sigma_1(\hat{X})^6 N^2 (\log M_{\text{init}})^3 r^2}{\sigma_r(\hat{X})^6 (k^{(1)} + k^{(2)})^2 \sigma_*(U; k^{(1)})^2}$$

and perform alternating minimization with  $s_1 = \log \left( \frac{\sigma_r \sigma_* (U; k^{(1)})}{48 \sigma_Z \sqrt{k^{(1)}}} \right)$  blocks of size

$$M_1 \geq C_{B.1}^{\text{iter}} \frac{\sigma_1(\hat{X})^6 r^3 N (\log M)^2}{\sigma_r(\hat{X})^6 k^{(2)} \sigma_*(U; k^{(1)})^2} + \log \left( \frac{1}{\epsilon} \right),$$

followed by alternating minimization with  $s_2 = 1$  block of size

$$M_2 \geq C_{B.2}^{\text{iter}} \frac{r^2 \sigma_Z^2 \sigma_1(\hat{X})^4 N k^{(1)} (\log M)^2}{\sigma_r(\hat{X})^6 k^{(2)} \sigma_*(U; k^{(1)})^2 \epsilon^2} + \log \left( \frac{1}{\epsilon} \right),$$

then `DOUBLECOLUMNSPACEESTIMATE`( $Y_t, k^{(1)}, k^{(2)}, M_{\text{init}}, M_1, M_2, s_1, s_2, \epsilon, \text{True}$ ) returns an  $\hat{X}$  such that  $\sin \theta(U, \hat{X}) \leq \epsilon$  with probability at least  $1 - 2M_{\text{init}}^{-2} - C_{B.1}^{\text{prob}} s_1 M_1^{-2} - C_{B.2}^{\text{prob}} M_2^{-2}$ .

## C SmoothQR Hardt (2014)

---

SMOOTHQR (Hardt, 2014): Smooth Orthonormalization

---

```

function SMOOTHQR( $\tilde{W}, \epsilon, \mu$ )
   $W \leftarrow \text{QR}(\tilde{W}), G_H \leftarrow 0, \sigma \leftarrow \epsilon \|\tilde{W}\|/M$ 
  while  $\mu(W) > \mu$  and  $\sigma \leq \|\tilde{W}\|$  do
     $\tilde{W} \leftarrow \text{GS}(\tilde{W} + G_H)$  where  $G_H \sim \mathcal{N}(0, \sigma^2/M)$ 
     $\sigma \leftarrow 2\sigma$ 
  end while
  return ( $W, G_H$ )
end function

```

---

## D Scaled PCA Estimator

Here  $\mathbf{1}_N \in \mathbb{R}^{N \times N}$  is the matrix with each entry equal to 1, and  $I_N \in \mathbb{R}^{N \times N}$  is the identity matrix.

---

SCALEDPCA

---

**Input:** Partially observed  $\mathcal{P}_\Omega(Y) \in \mathbb{R}^{N \times M}$ ;  $k$ , the number of entries per column,  $N$  the number of rows of  $\mathcal{P}_\Omega(Y)$

- 1: **function** SCALEDPCA( $\mathcal{P}_\Omega(Y), k, N$ )
- 2:  $C \leftarrow \mathcal{P}_\Omega(Y) \mathcal{P}_\Omega(Y)^T$
- 3:  $\triangleright$  We denote by  $\circ$  the Hadamard (elementwise) product
- 4:  $C_{\text{scaled}} \leftarrow \left( \frac{N^2}{k(k-1)} \mathbf{1}_N \right) \circ C + \left( \left( \frac{N}{k} - \frac{N^2}{k(k-1)} \right) I_N \right) \circ C$
- 5:  $\hat{X} \leftarrow \text{QR}(C_{\text{scaled}})$
- 6: **return**  $\hat{X}$
- 7: **end function**

---
